# Supplementary material for: Influence of alkali metal ions on the defect induced photoluminescence properties of double tungstate compounds ACe(WO 4 ) 2 (A = Li, Na, K): experimental and ab initio theoretical study
Source: Royal Society of Chemistry journal article supplement (doi:10.1039/d4ma01163e), 2025-01-01
Supplement: d4ma01163e1.pdf [file d4ma01163e1.pdf]

## Electronic Supplementary Information

### Influence of alkali metal ions on the defect induced photoluminescence properties of double tungstate compounds $ACe(WO_4)_2$ (A = Li, Na, K): Experimental and *ab initio* theoretical study

Nibedita Haldar<sup>(a)\*</sup> and Tanmoy Mondal<sup>(b)</sup>

<sup>(a)\*</sup>Institute of Engineering and Management (IEM), University of Engineering and Management Kolkata, 700160, India

<sup>(b)</sup>School of Materials Science and Nanotechnology, Jadavpur University, Jadavpur, Kolkata – 700032, India

(\*) Corresponding author's email ID: [nibedita.haldar@uem.edu.in](mailto:nibedita.haldar@uem.edu.in), Tel: 8250478156

Table S1. Coordination environment of triclinic ACWO nanostructures.

| Coordinates atoms | x      | y      | z      | Occupancy | Site occupancy | symmetry |
|-------------------|--------|--------|--------|-----------|----------------|----------|
| Li1/Na1/K1        | 0.2815 | 0.7733 | 0.1567 | 1.0       | 1a             | 1        |
| Li2/Na2/K2        | 0.7184 | 0.2266 | 0.8432 | 1.0       | 1a             | 1        |
| Ce1               | 0.1740 | 0.2878 | 0.4547 | 1.0       | 1a             | 1        |
| Ce2               | 0.2860 | 0.7121 | 0.5452 | 1.0       | 1a             | 1        |
| O1                | 0.1823 | 0.3500 | 0.7987 | 1.0       | 1a             | 1        |
| O2                | 0.8176 | 0.6500 | 0.2012 | 1.0       | 1a             | 1        |
| O3                | 0.4619 | 0.6413 | 0.2627 | 1.0       | 1a             | 1        |
| O4                | 0.5380 | 0.4586 | 0.7372 | 1.0       | 1a             | 1        |
| O5                | 0.8659 | 0.0119 | 0.1955 | 1.0       | 1a             | 1        |
| O6                | 0.1340 | 0.9880 | 0.8044 | 1.0       | 1a             | 1        |
| O7                | 0.7074 | 0.0107 | 0.4898 | 1.0       | 1a             | 1        |
| O8                | 0.2925 | 0.9893 | 0.5101 | 1.0       | 1a             | 1        |
| O9                | 0.1740 | 0.6339 | 0.5530 | 1.0       | 1a             | 1        |

|     |        |        |        |     |    |   |
|-----|--------|--------|--------|-----|----|---|
| O10 | 0.8259 | 0.3660 | 0.4469 | 1.0 | 1a | 1 |
| O11 | 0.4847 | 0.8316 | 0.0074 | 1.0 | 1a | 1 |
| O12 | 0.5152 | 0.1683 | 0.9925 | 1.0 | 1a | 1 |
| O13 | 0.0578 | 0.3132 | 0.1062 | 1.0 | 1a | 1 |
| O14 | 0.9421 | 0.6868 | 0.8937 | 1.0 | 1a | 1 |
| O15 | 0.3906 | 0.1712 | 0.2675 | 1.0 | 1a | 1 |
| O16 | 0.6093 | 0.8287 | 0.7324 | 1.0 | 1a | 1 |
| W1  | 0.2753 | 0.2990 | 0.0396 | 1.0 | 1a | 1 |
| W2  | 0.7246 | 0.7009 | 0.9603 | 1.0 | 1a | 1 |
| W3  | 0.6569 | 0.1086 | 0.2887 | 1.0 | 1a | 1 |
| W4  | 0.3430 | 0.8913 | 0.7112 | 1.0 | 1a | 1 |

Table S2. Refined structural parameters and the reliability factors from Rietveld refinement of ACWO nanostructures.

| Properties                                       |          | LCWO                    | NCWO                    | KCWO                   |
|--------------------------------------------------|----------|-------------------------|-------------------------|------------------------|
| Lattice parameter ( $\text{\AA}^0$ )             | a        | 7.082(7)                | 7.499(5)                | 7.061(4)               |
|                                                  | b        | 8.009(10)               | 8.254(6)                | 8.011(5)               |
|                                                  | c        | 7.405(8)                | 7.058(5)                | 7.445(4)               |
|                                                  | $\alpha$ | 114.341                 | 113.441                 | 114.122                |
|                                                  | $\beta$  | 116.476                 | 115.151                 | 116.991                |
|                                                  | $\gamma$ | 90.258                  | 91.462                  | 90.285                 |
| Unit cell volume ( $\text{\AA}^0$ ) <sup>3</sup> |          | 333.343(6)              | 352.753(4)              | 333.032(3)             |
| Bond length ( $\text{\AA}^0$ )                   | A-O      | 2.413(4)                | 2.503(4)                | 2.408(2)               |
|                                                  | Ce-O     | 2.410(18),<br>2.569(14) | 2.521(14),<br>2.636(12) | 2.394(10),<br>2.590(7) |
|                                                  | W-O      | 1.919(4)                | 1.978(4)                | 1.916(5)               |
| Bond angle (in degree)                           | A-O-W    | 92.280(3)               | 93.269(18)              | 92.541(12)             |
|                                                  | A-O-Ce   | 114.613(19)             | 114.606(17)             | 114.334(11)            |
|                                                  | O-Ce-O   | 74.790(3)               | 74.800(7)               | 74.650(13)             |
|                                                  | Ce-O-W   | 145.346(18)             | 145.402(3)              | 145.208(8)             |
|                                                  | O-A-O    | 69.283(3)               | 66.861(4)               | 69.272(12)             |
|                                                  | O-W-O    | 89.614(13)              | 87.290(5)               | 89.600(5)              |
| $R_p$ (%)                                        |          | 10.5                    | 12.8                    | 13.9                   |
| $R_{wp}$ (%)                                     |          | 15.5                    | 16.2                    | 17.3                   |
| $R_{exp}$ (%)                                    |          | 10.2                    | 10.3                    | 10.3                   |
| $\chi^2$                                         |          | 2.80                    | 2.51                    | 2.82                   |

Table S3. The details of the deconvolution of the FTIR bands of ACWO nanostructures.

| Samples   | Peak position (cm <sup>-1</sup> ) | Area (cm <sup>2</sup> ) | FWHM   | $\chi^2$ |       |
|-----------|-----------------------------------|-------------------------|--------|----------|-------|
| LCWO      | 660 – 718                         | 670                     | 0.097  | 1.761    | 2.10  |
|           |                                   | 679                     | 0.052  | 6.188    |       |
|           |                                   | 695                     | 0.203  | 11.938   |       |
|           |                                   | 702                     | 0.065  | 4.608    |       |
|           | 718-780                           | 742                     | 0.926  | 14.634   | 2.30  |
|           |                                   | 762                     | 1.179  | 15.532   |       |
|           | 780 – 910                         | 812                     | 5.781  | 29.355   | 2.70  |
|           |                                   | 857                     | 12.933 | 46.013   |       |
|           |                                   | 882                     | 4.594  | 29.232   |       |
|           | NCWO                              | 660 – 718               | 670    | 0.061    | 1.347 |
| 678       |                                   |                         | 0.094  | 9.493    |       |
| 693       |                                   |                         | 0.021  | 4.076    |       |
| 697       |                                   |                         | 0.164  | 15.086   |       |
| 718-780   |                                   | 733                     | 0.695  | 14.939   | 3.20  |
|           |                                   | 747                     | 1.619  | 27.337   |       |
| 780 – 910 |                                   | 797                     | 1.795  | 21.575   | 2.42  |
|           |                                   | 823                     | 3.520  | 35.468   |       |
|           |                                   | 867                     | 11.595 | 53.496   |       |
| KCWO      |                                   | 660 – 718               | 670    | 0.048    | 1.323 |
|           | 681                               |                         | 0.175  | 10.116   |       |
|           | 696                               |                         | 0.108  | 7.053    |       |
|           | 706                               |                         | 0.071  | 8.035    |       |

|  |           |     |        |        |      |
|--|-----------|-----|--------|--------|------|
|  | 718-780   | 740 | 0.264  | 11.615 | 3.40 |
|  |           | 764 | 0.220  | 11.566 |      |
|  | 780 – 910 | 816 | 4.412  | 34.078 | 1.97 |
|  |           | 856 | 11.339 | 43.998 |      |
|  |           | 882 | 2.626  | 25.473 |      |

Table S4. Lattice parameters of ACWO nanostructures from DFT calculation.

| Lattice parameter (Å) | LCWO  | NCWO  | KCWO  |
|-----------------------|-------|-------|-------|
| a                     | 7.110 | 7.115 | 7.760 |
| b                     | 7.430 | 7.348 | 7.571 |
| c                     | 7.535 | 7.271 | 7.577 |
| A-O                   | 2.06  | 2.32  | 2.79  |
| Ce-O                  | 2.45  | 2.38  | 2.35  |
| W-O                   | 1.82  | 1.80  | 1.82  |

Table S5. The contributed orbitals for different emissions of ACWO nanostructures from defect states (DFT).

| Transitions                | LCWO                                                                | NCWO                                                                | KCWO                                            | Deformed structure of CeO <sub>8</sub> |
|----------------------------|---------------------------------------------------------------------|---------------------------------------------------------------------|-------------------------------------------------|----------------------------------------|
| Blue II (2V <sub>O</sub> ) | 5d <sub>xz</sub> → 4f                                               | 5d <sub>xz</sub> → 4f                                               | 5d <sub>xz</sub> → 4f                           | CeO <sub>6</sub>                       |
| Blue III (V <sub>O</sub> ) | (5d <sub>xz</sub> , 5d <sub>x<sup>2</sup>-y<sup>2</sup>) → 4f</sub> | (5d <sub>xz</sub> , 5d <sub>x<sup>2</sup>-y<sup>2</sup>) → 4f</sub> | (5d <sub>xy</sub> , 5d <sub>yz</sub> ) → 4f     | CeO <sub>7</sub>                       |
| Green (2V <sub>O</sub> )   | 5d <sub>x<sup>2</sup>-y<sup>2</sup>) → 4f</sub>                     | 5d <sub>x<sup>2</sup>-y<sup>2</sup>) → 4f</sub>                     | 5d <sub>x<sup>2</sup>-y<sup>2</sup>) → 4f</sub> | CeO <sub>6</sub>                       |

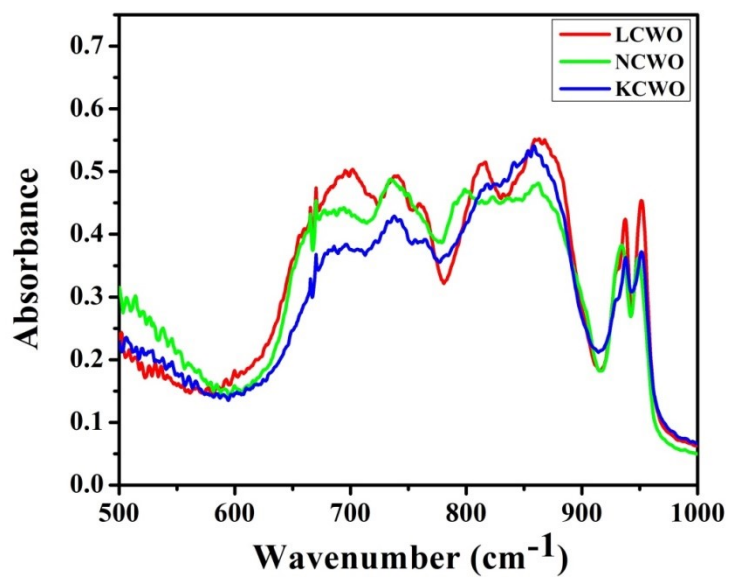

Fig. S1 FTIR of ACWO nanostructures.

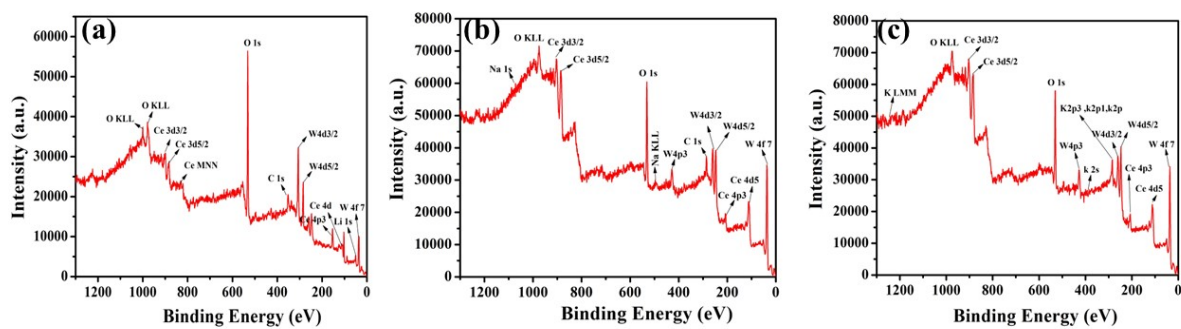

Fig. S2 XPS wide spectrum of (a)LCWO, (b)NCWO and (c)KCWO respectively.

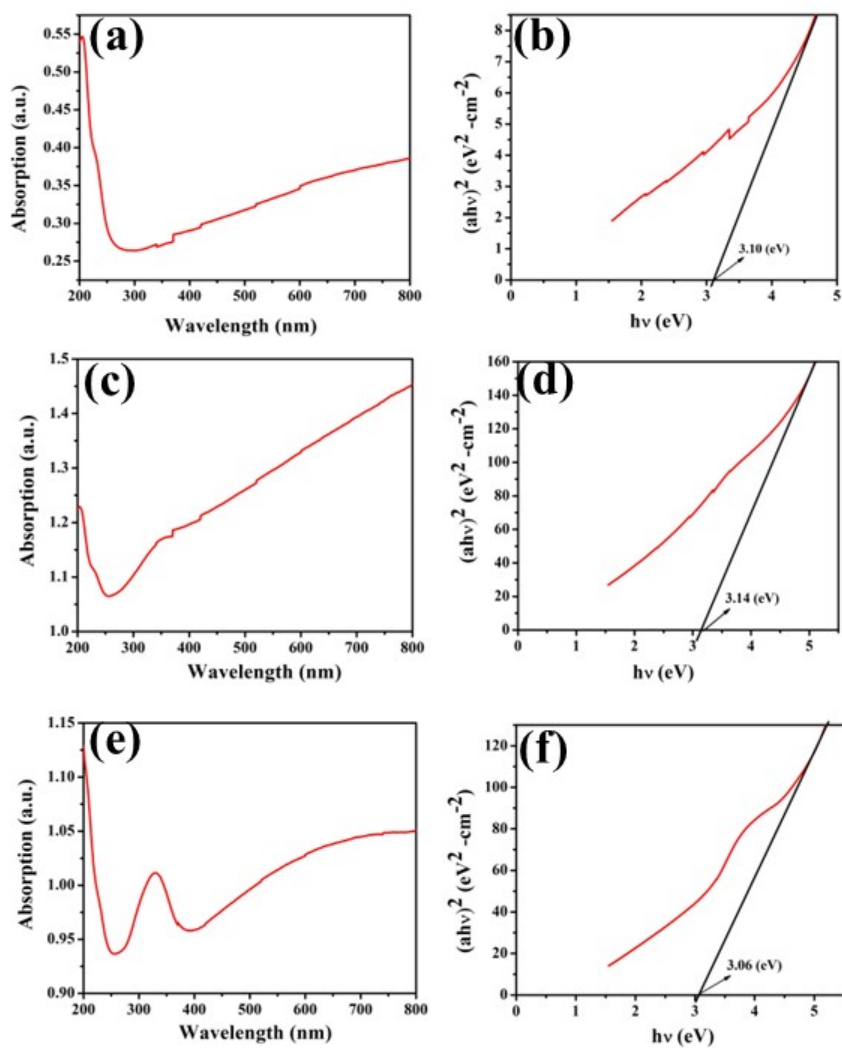

Fig. S3 UV spectra and corresponding band gaps for (a, b) LCWO, (c, d) NCWO and (e, f) KCWO respectively.

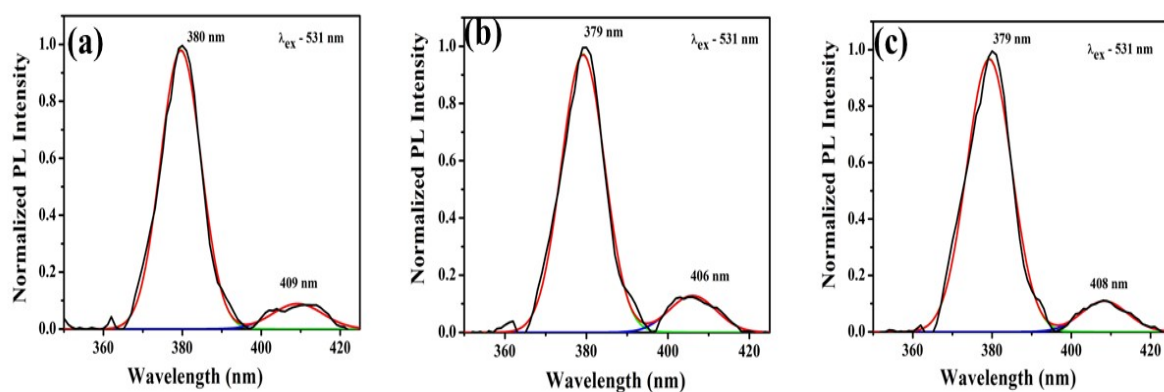

Fig. S4 PLE spectra for (a)LCWO, (b)NCWO and (c)KCWO respectively.

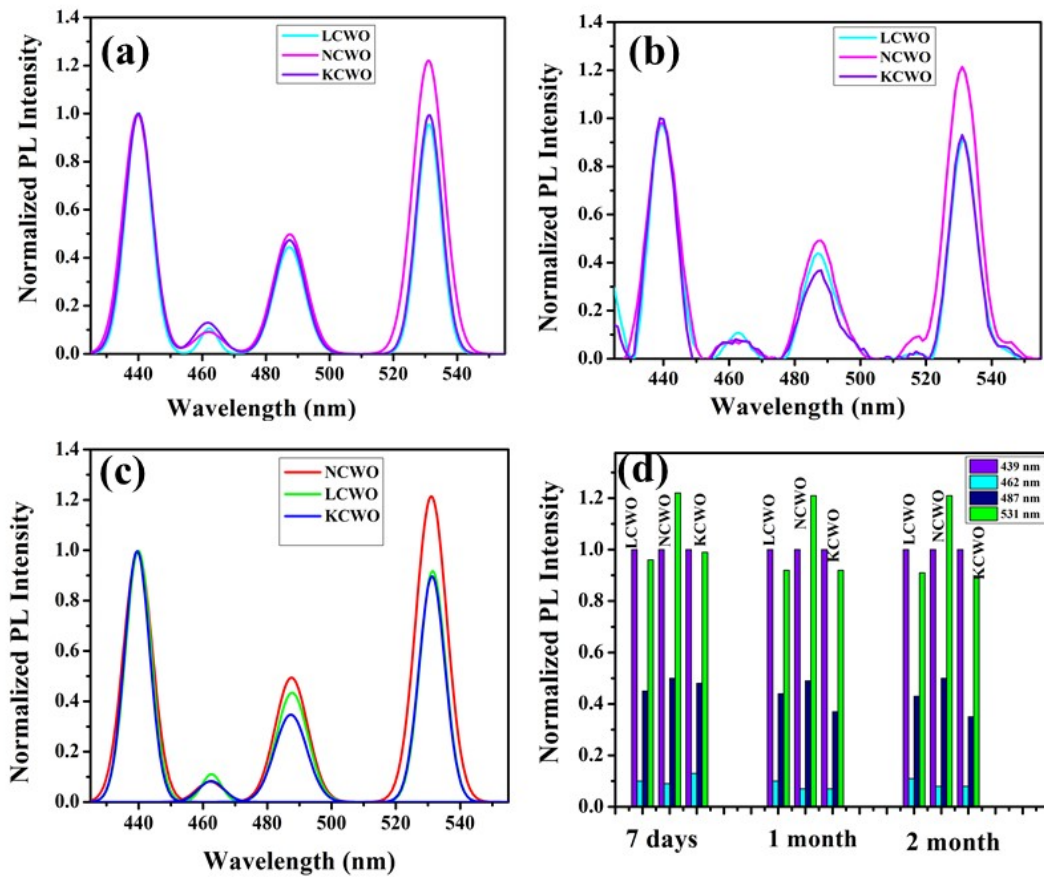

Fig. S5 (a-c) Photoluminescence spectra of ACWO samples after 7 days, 1 month and 2 months from the preparation date and (d) stability curve of the fluorescence experiments.

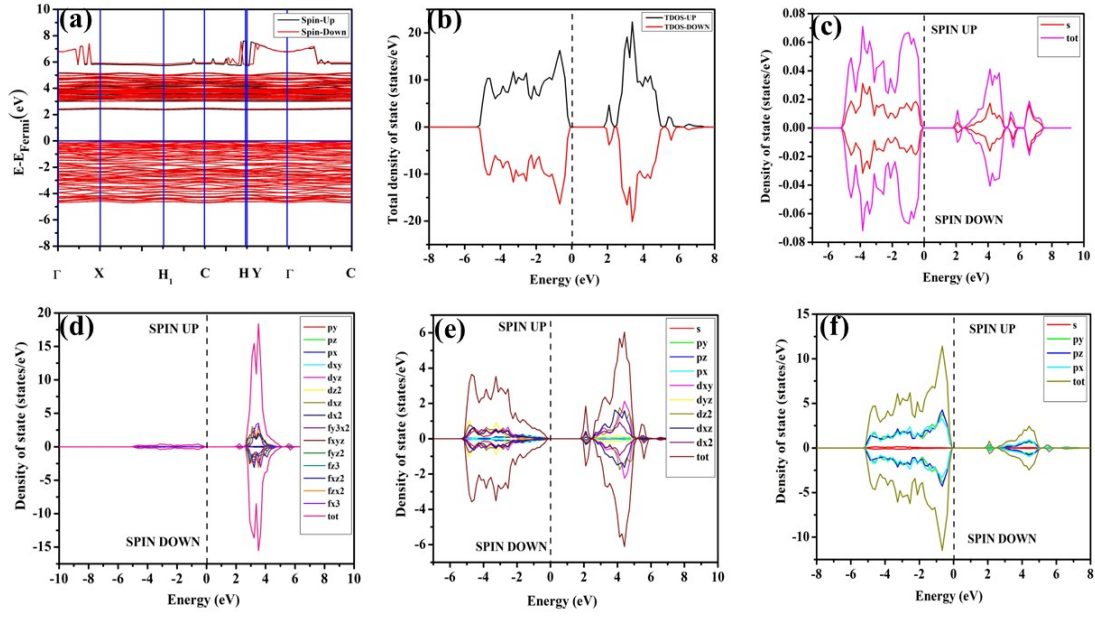

Fig. S6 (a) Band structure and (b) spin polarised TDOS and PDOS of (c) Li, (d) Ce, (e) W and (f) O of  $\text{LCWO} - V_{\text{O}}^{\bullet}$ .

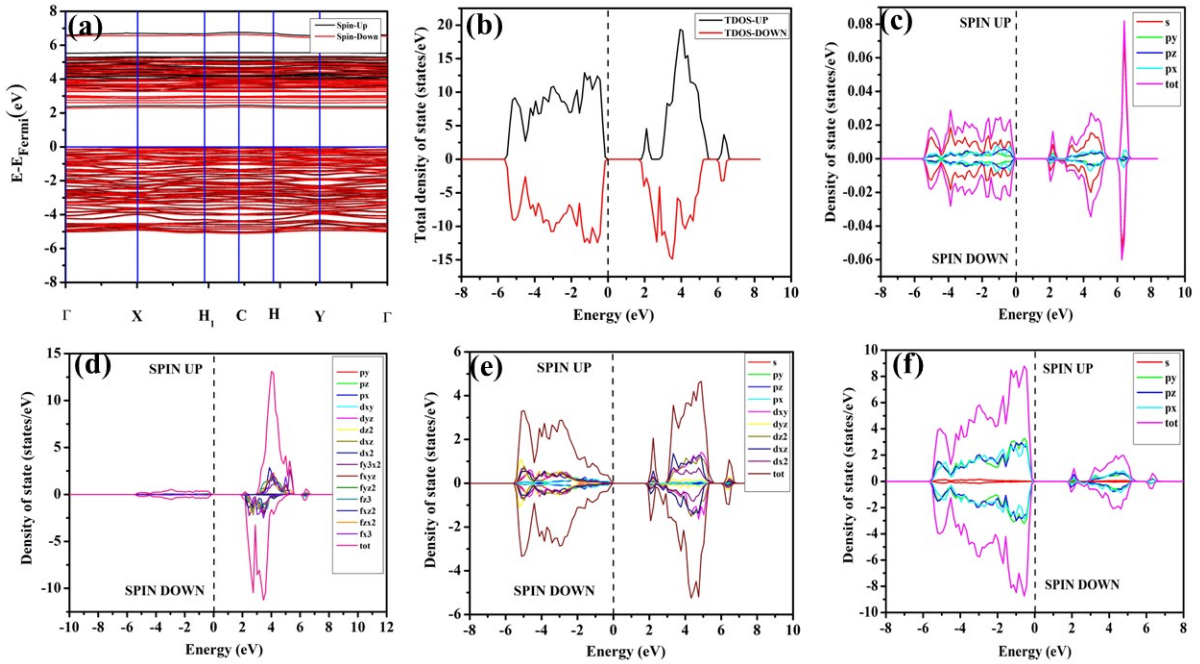

Fig. S7 (a) Band structure and (b) spin polarised TDOS and PDOS of (c) Na, (d) Ce, (e) W and (f) O of  $\text{NCWO} - V_{\text{O}}^{\bullet}$ .



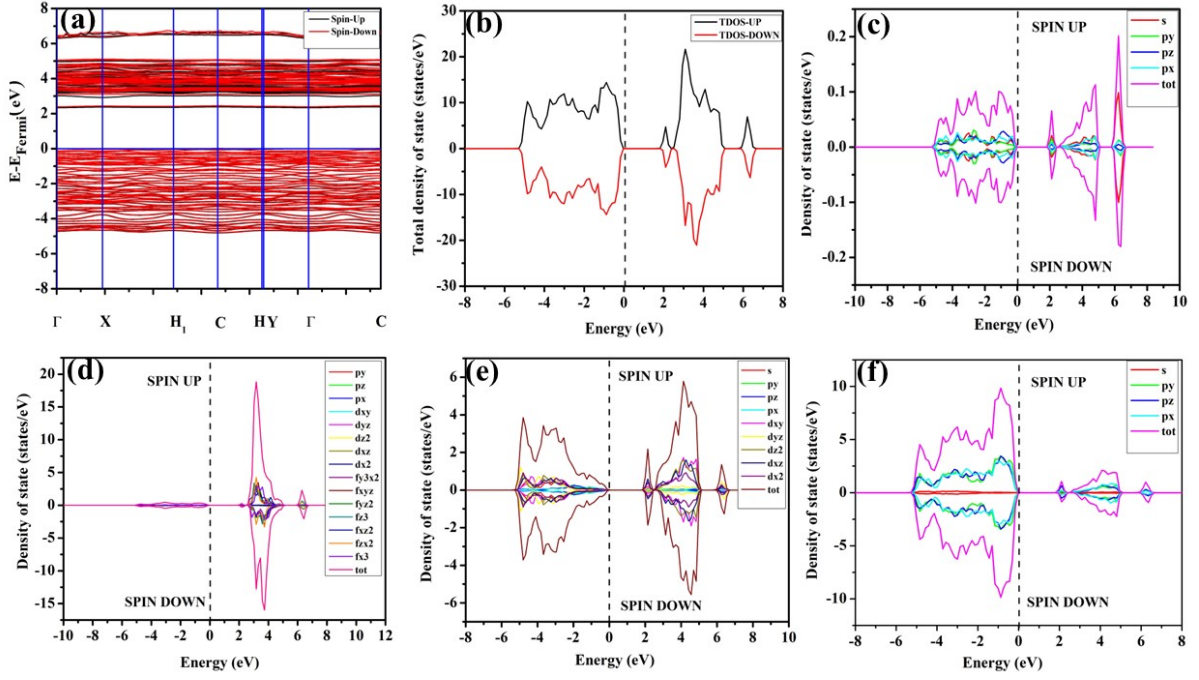

Fig. S8 (a) Band structure and (b) spin polarised TDOS and PDOS of (c) K, (d) Ce, (e) W and (f) O of  $\text{KCWO} - V_0^*$ .

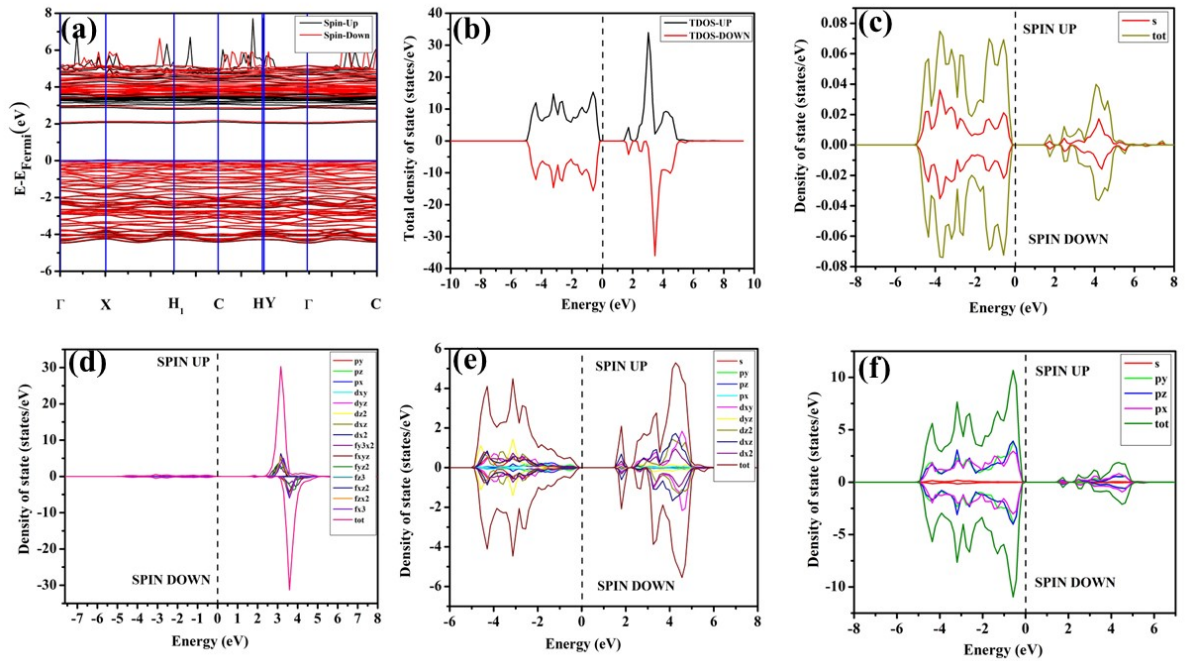

Fig. S9 (a) Band structure and (b) spin polarised TDOS and PDOS of (c) Li, (d) Ce, (e) W and (f) O of  $\text{LCWO} - 2V_0^*$ .

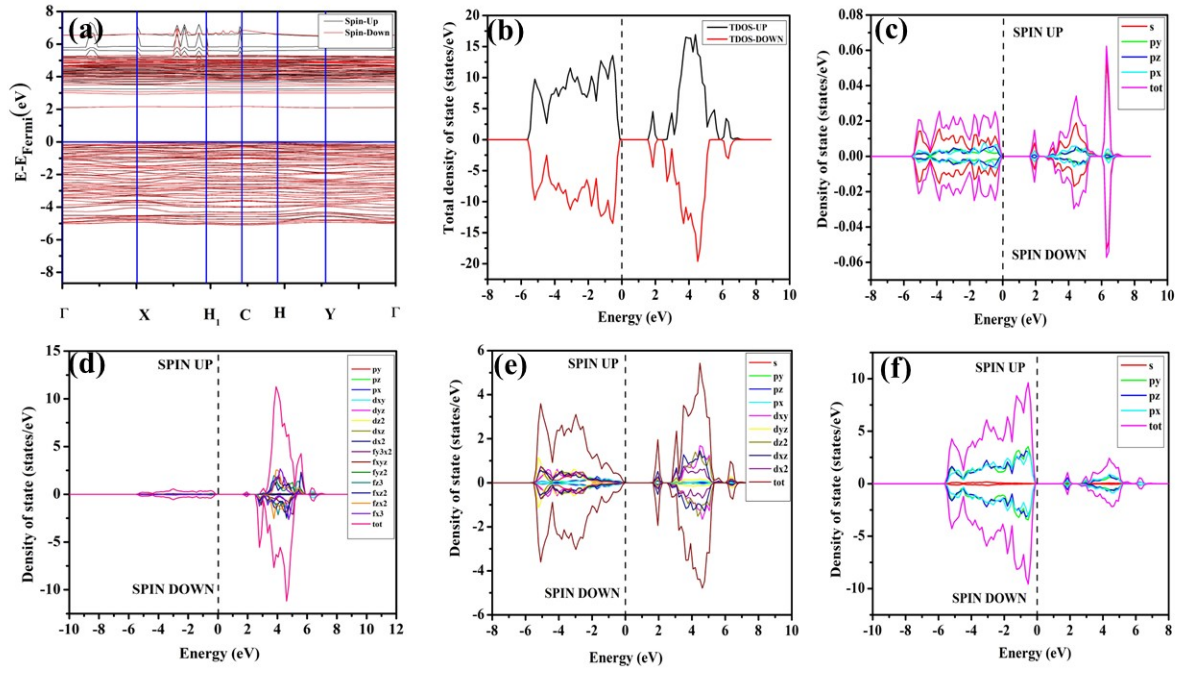

Fig. S10 (a) Band structure and (b) spin polarised TDOS and PDOS of (c) Na, (d) Ce, (e) W and (f) O of  $\text{NCWO} - 2V_0^\bullet$ .

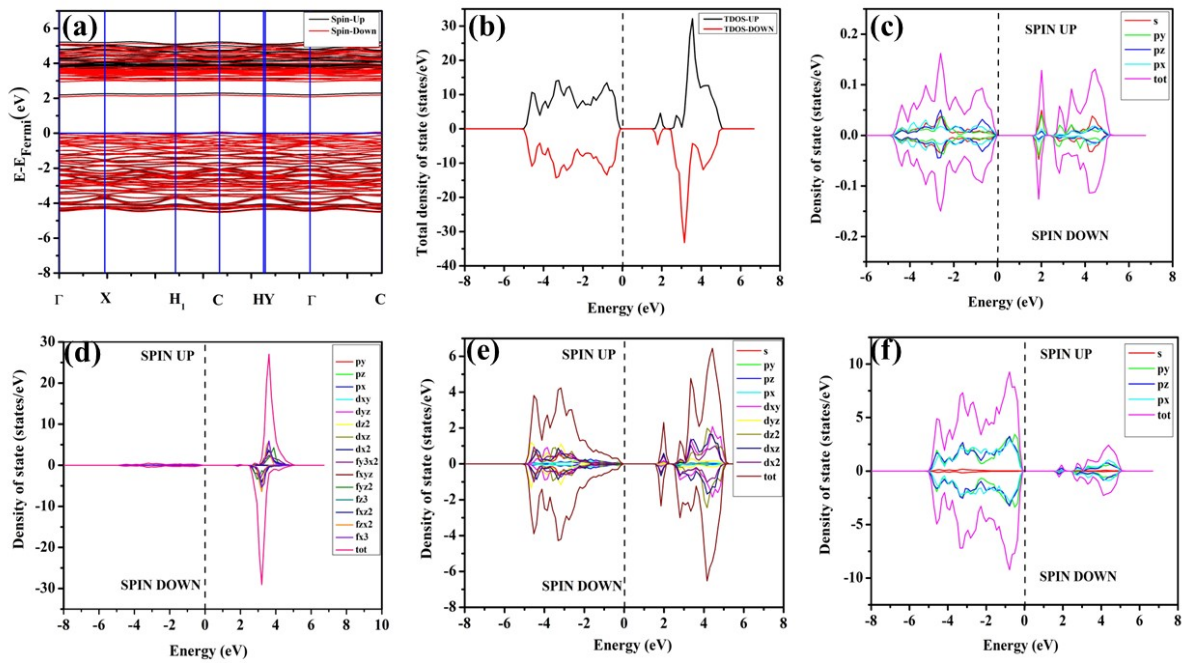

Fig. S11 (a) Band structure and (b) spin polarised TDOS and PDOS of (c) K, (d) Ce, (e) W and (f) O of  $\text{KCWO} - 2V_0^\bullet$ .
